# Supplementary material for: Loss of has-miR-337-3p expression is associated with lymph node metastasis of human gastric cancer
Source: Springer Nature journal article supplement (doi:10.1186/1756-9966-32-76), 2013-10-16

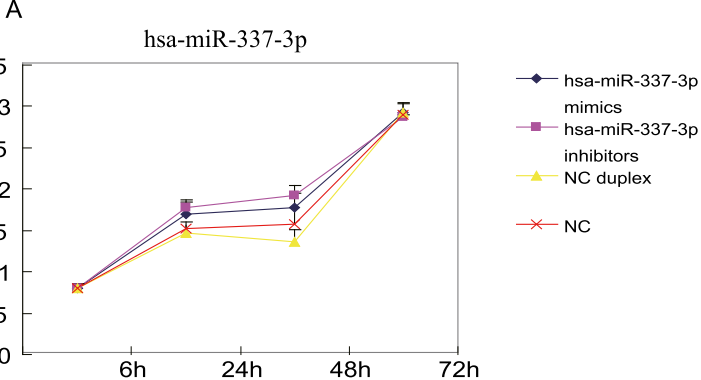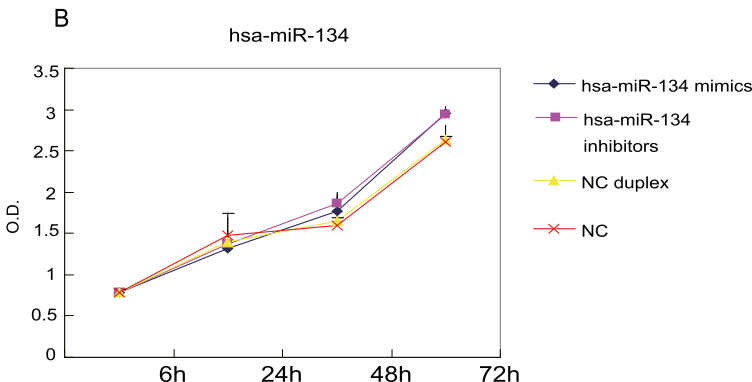

Supplement: 13046_2013_712_MOESM6_ESM.pdf [file 13046_2013_712_MOESM6_ESM.pdf]
